# Supplementary material for: Improving protein function prediction using domain and protein complexes in PPI networks
Source: Springer Nature journal article supplement (doi:10.1186/1752-0509-8-35), 2014-03-24
Supplement: 12918_2012_1311_MOESM1_ESM.pdf [file 12918_2012_1311_MOESM1_ESM.pdf]

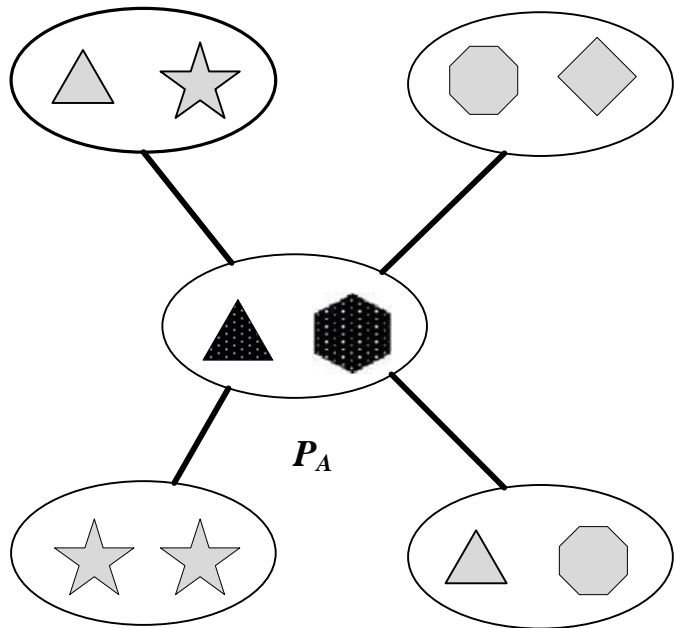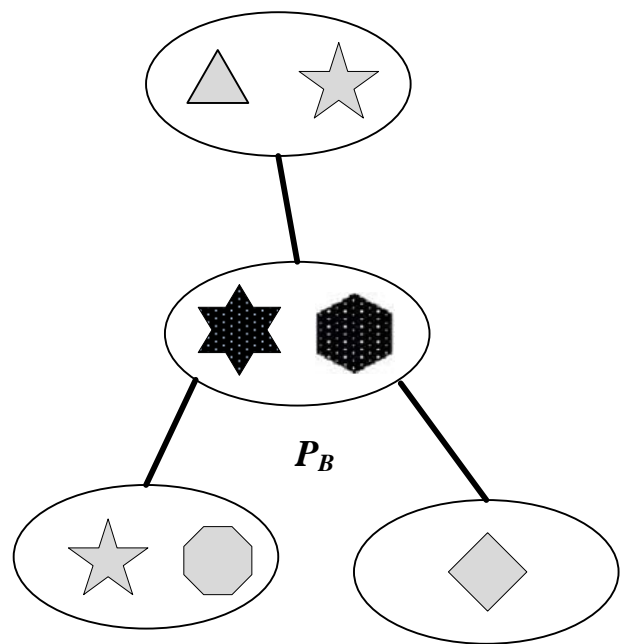

$$a = |\text{DC}(P_A)| = |\{\triangle, \text{octagon}, \text{diamond}, \text{star}, \text{hexagon}, \blacktriangle\}| = 6 \quad b = |\text{DC}(P_B)| = |\{\triangle, \text{octagon}, \text{diamond}, \text{star}, \text{hexagon}, \blackstar\}| = 6$$

$$s = |\text{DC}(P_A) \cap \text{DC}(P_B)| = |\{\triangle, \text{octagon}, \text{diamond}, \text{star}, \text{hexagon}\}| = 5$$

$$a' = |\text{DT}(P_A)| = |\{\text{hexagon}, \blacktriangle\}| = 2$$

$$b' = |\text{DT}(P_B)| = |\{\text{hexagon}, \blackstar\}| = 2$$

$$s' = |\text{DT}(P_A) \cap \text{DT}(P_B)| = |\{\text{hexagon}\}| = 1$$
