# Supplementary material for: Improving protein function prediction using domain and protein complexes in PPI networks
Source: Springer Nature journal article supplement (doi:10.1186/1752-0509-8-35), 2014-03-24

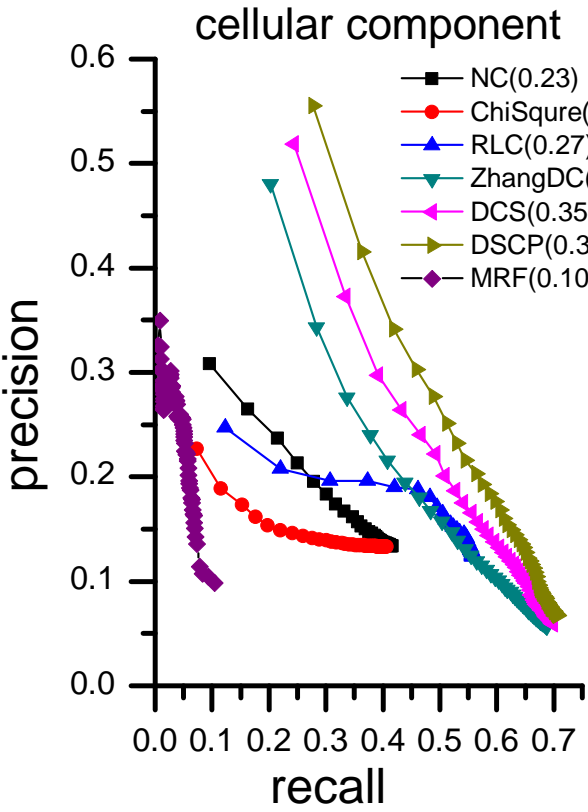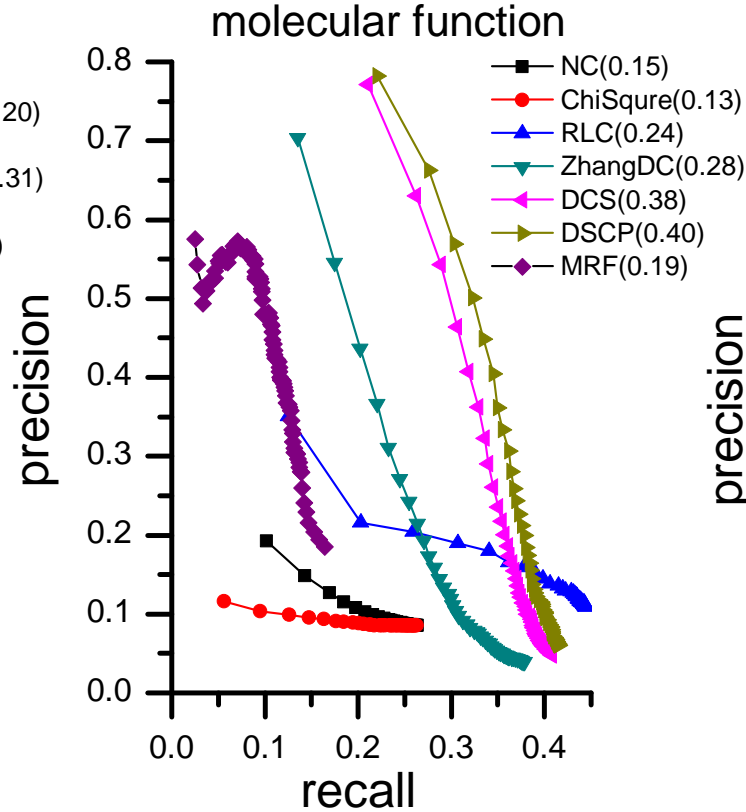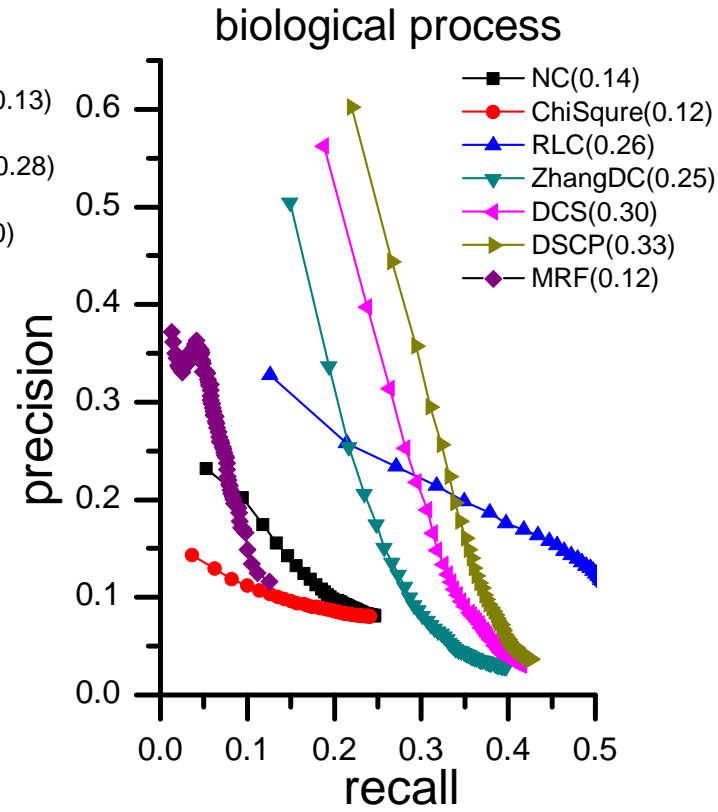

Supplement: 12918_2012_1311_MOESM4_ESM.pdf [file 12918_2012_1311_MOESM4_ESM.pdf]
